# Supplementary material for: Organic/inorganic hybrid mesoporous silica membrane rapidly synthesized by a microwave-assisted method and its application in enzyme adsorption and electrocatalysis
Source: Royal Society of Chemistry journal article supplement (doi:10.1039/c3tb20169d), 2013-01-01
Supplement: c3tb20169d.pdf [file c3tb20169d.pdf]

### Supporting Information

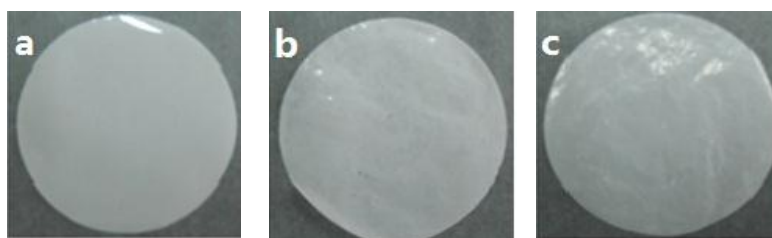

Fig. S1 Macroscopic images of (a) a bare PC membrane, (b) the organic/inorganic HMSM without solvent extraction, (c) the organic-inorganic HMSM with solvent extraction.

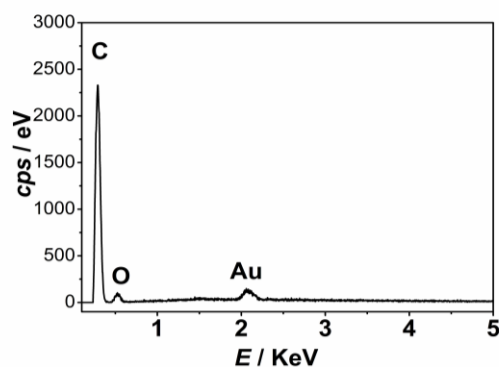

Fig. S2 The EDS analysis on the surface of bare PC membrane

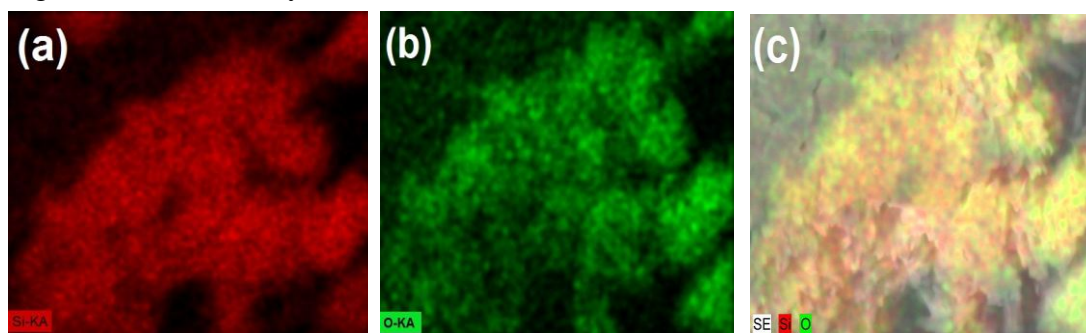

Fig. S3. EDS mappings of the silica rods (a-c) released from HMSM (red (a) and green (b) colors respectively present silicon element mapping and oxygen element mapping).

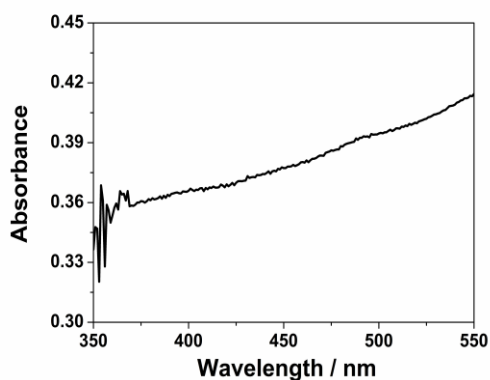

Fig.S4. The reflected UV-Vis spectrum of bare PC without enzyme adsorption.

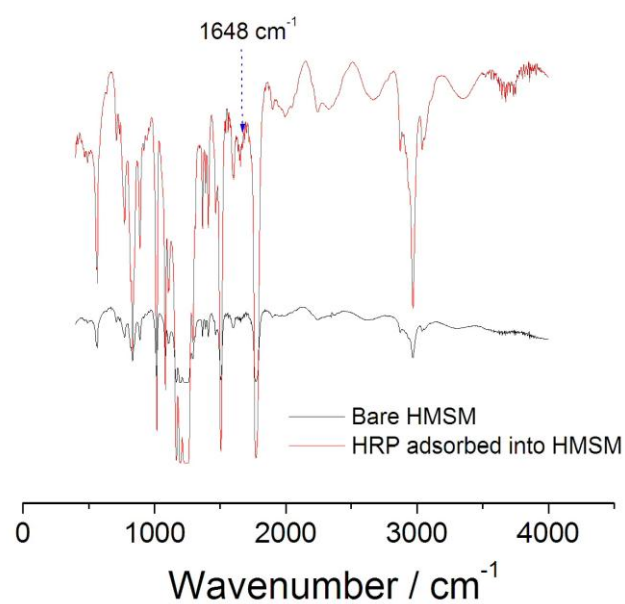

Fig.S5. The FT-IR spectra of (a) bare HMSM and (b) HRP adsorbed into HMSM.

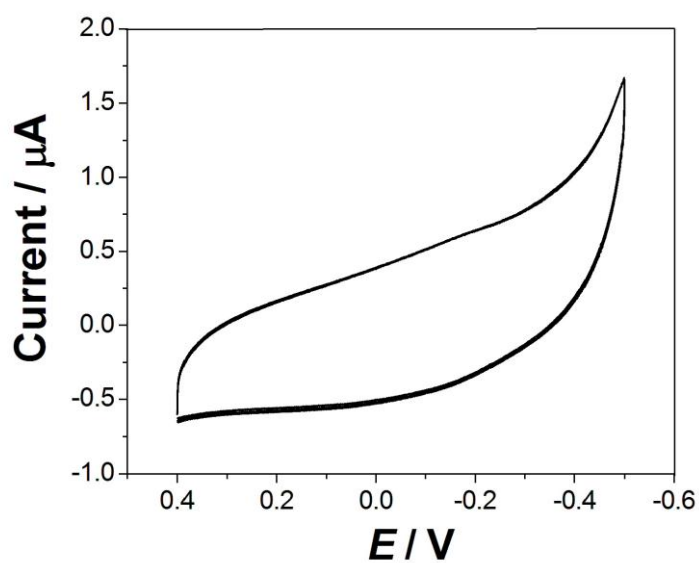

Fig.S6. CVs of bare GC electrode in 0.1M PBS (pH~7.0) containing HRP ( $0.0055 \text{ g L}^{-1}$ ). Scan rate:  $200 \text{ mV s}^{-1}$ .

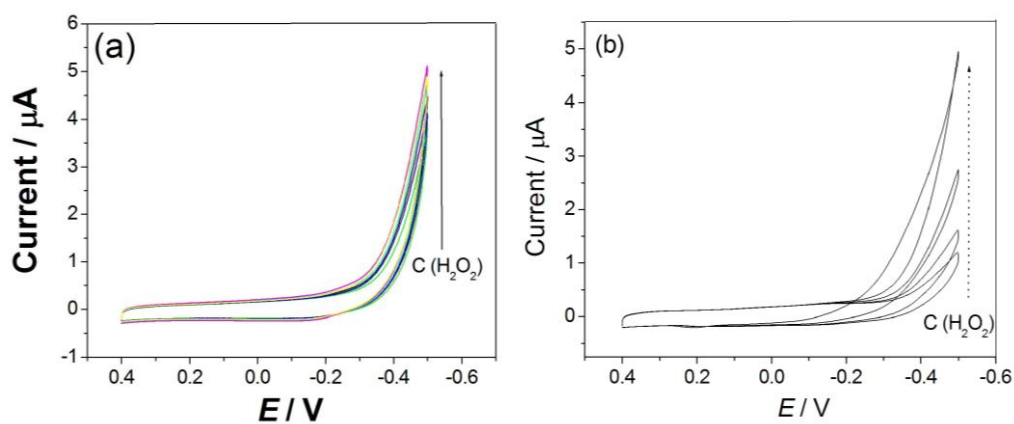

Fig.S7. CVs of (a) bare GC and (b) HRP-GC obtained in the presence of 0.003, 0.01, 0.018, 0.025 and 0.035 M of  $\text{H}_2\text{O}_2$  in PBS (pH~7.0).
